# Supplementary material
Source: MDPI journal article supplement (https://www.mdpi.com/2227-9717/10/9/1893)
Supplement: s1 [file s1]

**Table S1.** Regression coefficients for time-kill kinetics study of control samples with *E. coli*; *S. aureus*; and *S. Typhimurium*

| Coefficient | <i>E. coli</i> | <i>S. aureus</i> | <i>S. Typhimurium</i> |
|-------------|----------------|------------------|-----------------------|
| d           | 8.960          | 8.018            | 8.131                 |
| a           | 6.017          | 5.992            | 5.999                 |
| b           | 2.009          | 2.469            | 1.198                 |
| c           | 2.688          | 5.556            | 7.049                 |
