# Supplementary material
Source: MDPI journal article supplement (https://www.mdpi.com/2227-9717/10/9/1893)
Supplement: s1 [file s1]

**Table S2.** The 'goodness of fit' tests for prediction models

| <b>Parameters</b>     | <b><math>\chi^2</math></b> | <b>RMSE</b> | <b>MBE</b> | <b>MPE</b> | <b><math>r^2</math></b> | <b>Skew</b> | <b>Kurt</b> | <b>SD</b> | <b>Var.</b> |
|-----------------------|----------------------------|-------------|------------|------------|-------------------------|-------------|-------------|-----------|-------------|
| <i>E. coli</i>        | 0.014                      | 0.109       | 0.000      | 1.027      | 0.986                   | -1.457      | 3.163       | 0.117     | 0.014       |
| <i>S. aureus</i>      | 0.006                      | 0.070       | 0.000      | 0.795      | 0.989                   | -1.371      | 2.140       | 0.075     | 0.006       |
| <i>S. Typhimurium</i> | 0.011                      | 0.096       | 0.000      | 1.198      | 0.966                   | -0.120      | -0.966      | 0.103     | 0.011       |
